# Supplementary material
Source: bioRxiv or medRxiv preprint supplement (https://www.biorxiv.org/highwire/filestream/120416/field_highwire_adjunct_files/4/397992-5.pdf)
Supplement: Supplementary file [file 397992-5.pdf]

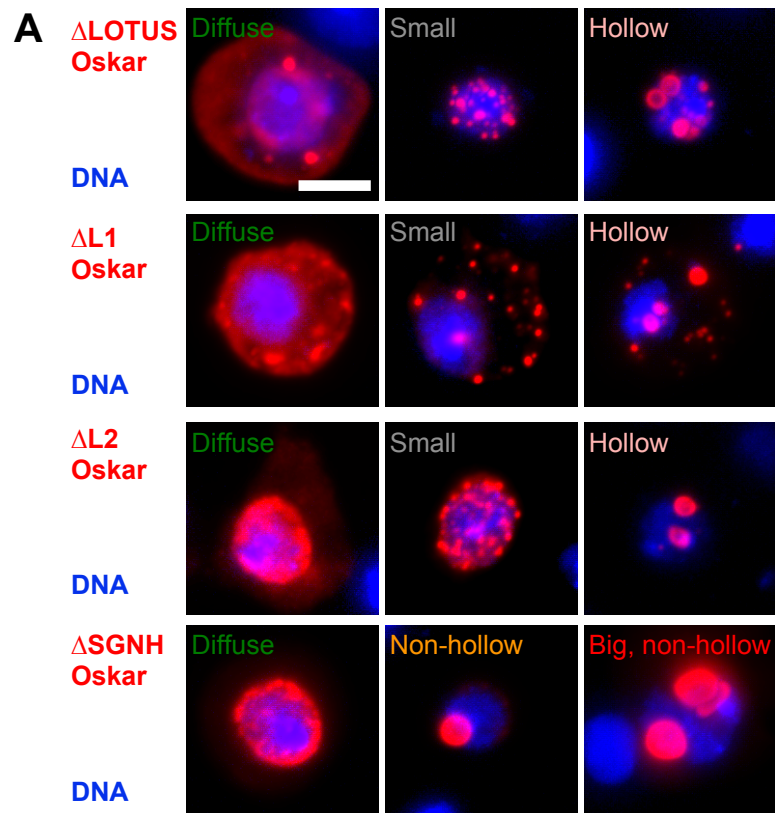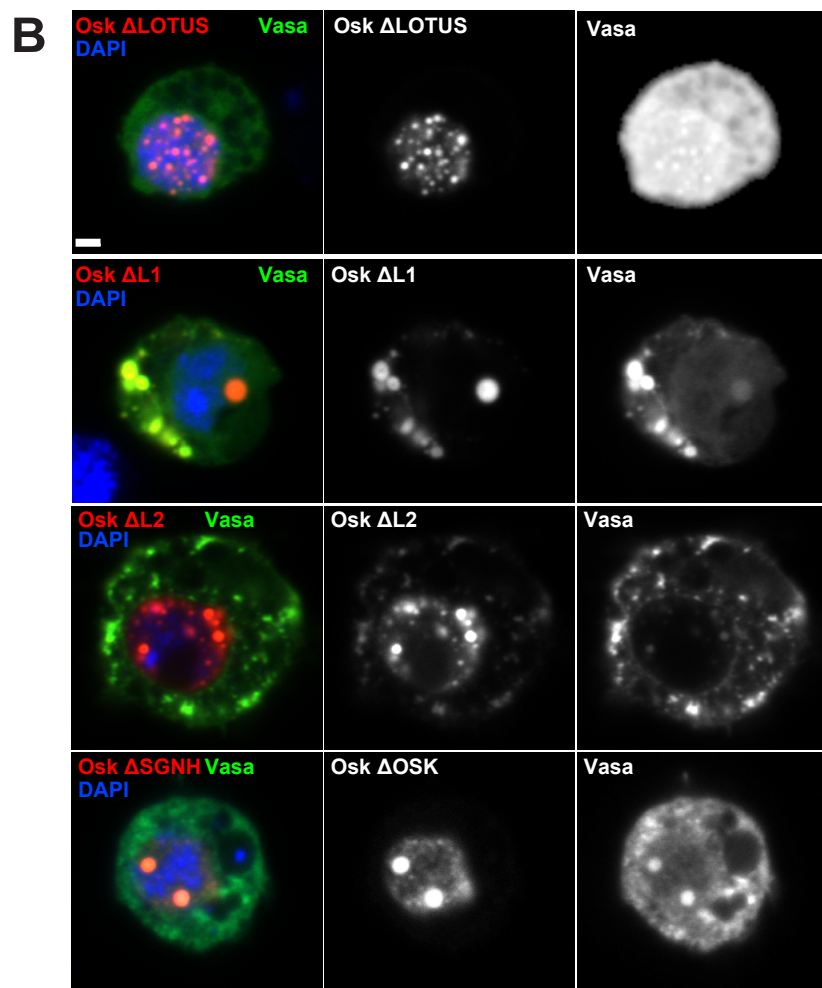

**C**

1: FL Short Osk:mCherry  
 2:  $\Delta$ LOTUS:mCherry  
 3:  $\Delta$ SGNH:mCherry  
 4:  $\Delta$ L1:mCherry  
 5:  $\Delta$ L2:mCherry

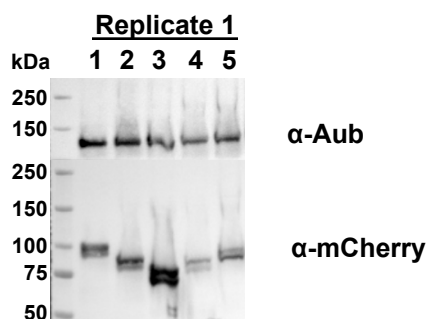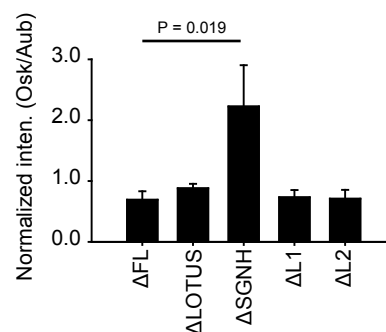

**Figure S5**
